# Supplementary material
Source: PubMed Central journal article supplement (PMC5845664)
Supplement: jgv-98-2635-s001.pdf [file jgv-98-2635-s001.pdf]

| <b>Allele</b>      | <b>Isolate 1</b>     | <b>Isolate 2</b>     | <b>Isolate 3</b>      | <b>Isolate 4</b>     | <b>Isolate 5</b>     | <b>Isolate 6</b>      | <b>Isolate 7</b>      | <b>Isolate 8</b>     |
|--------------------|----------------------|----------------------|-----------------------|----------------------|----------------------|-----------------------|-----------------------|----------------------|
| <b>QGAQ</b>        | 0.0053<br>(0.00025)  | 0.005<br>(0.00032)   | 0.0034<br>(0.00030)   | 0.0051<br>(0.00019)  | 0.0038<br>(0.00025)  | 0.0028<br>(0.00022)   | 0.0053<br>(0.00024)   | 0.0048<br>(0.00030)  |
| <b>QGGQ</b>        | 0.0047<br>(0.00018)  | 0.0047<br>(0.00024)  | 0.0034<br>(0.00038)   | 0.0060<br>(0.00026)  | 0.0042<br>(0.00039)  | 0.0027<br>(0.00026)   | 0.0053<br>(0.000096)  | 0.0051<br>(0.00012)  |
| <b>QSAQ</b>        | 0.0024<br>(0.00010)  | 0.0022<br>(0.000089) | 0.0017<br>(0.00016)   | 0.0028<br>(0.00010)  | 0.0020<br>(0.00012)  | 0.00089<br>(0.00015)  | (0.0028)<br>(0.00011) | 0.0025<br>(0.00012)  |
| <b>HGAQ</b>        | 0.0024<br>(0.00020)  | 0.0020<br>(0.00018)  | 0.0011<br>(0.00015)   | 0.0027<br>(0.000074) | 0.0016<br>(0.00017)  | 0.00083<br>(0.00017)  | 0.0027<br>(0.000097)  | 0.0025<br>(0.000088) |
| <b>QGAK</b>        | 0.0016<br>(0.000080) | 0.0013<br>(0.00016)  | 0.00075<br>(0.000097) | 0.0022<br>(0.00010)  | 0.00081<br>(0.00016) | 0.00076<br>(0.00016)  | 0.0019<br>(0.000088)  | 0.0015<br>(0.00021)  |
| <b>225F</b>        | 0.0020<br>(0.000078) | 0.0017<br>(0.00011)  | 0.00070<br>(0.000099) | 0.0029<br>(0.00017)  | 0.0011<br>(0.00016)  | 0.00059<br>(0.000042) | 0.0026<br>(0.00011)   | 0.0018<br>(0.00017)  |
| <b>132M</b>        | 0.0029<br>(0.000097) | 0.0027<br>(0.00013)  | 0.0018<br>(0.00012)   | 0.0033<br>(0.00014)  | 0.0018<br>(0.000061) | 0.00085<br>(0.00011)  | 0.0028<br>(0.000077)  | 0.0021<br>(0.000072) |
| <b>132L</b>        | 0.0021<br>(0.00015)  | 0.0024<br>(0.00017)  | 0.0014<br>(0.000085)  | 0.0027<br>(0.00010)  | 0.0019<br>(0.00013)  | 0.0011<br>(0.00028)   | 0.0025<br>(0.000057)  | 0.0019<br>(0.00015)  |
| <b>138N</b>        | 0.0030<br>(0.00010)  | 0.0026<br>(0.00017)  | 0.0017<br>(0.00024)   | 0.0036<br>(0.000080) | 0.0020<br>(0.00014)  | 0.0011<br>(0.00022)   | 0.0033<br>(0.00010)   | 0.0027<br>(0.0002)   |
| <b>MSSM</b>        | 0.0023<br>(0.000074) | 0.0022<br>(0.00012)  | 0.0012<br>(0.00020)   | 0.0030<br>(0.00011)  | 0.0018<br>(0.00019)  | 0.00084<br>(0.00014)  | 0.0024<br>(0.00011)   | 0.0017<br>(0.00011)  |
| <b>225Y</b>        | 0.0025<br>(0.000092) | 0.0020<br>(0.00014)  | 0.0015<br>(0.00014)   | 0.0028<br>(0.00012)  | 0.0018<br>(0.000079) | 0.00092<br>(0.00019)  | 0.0021<br>(0.00010)   | 0.0015<br>(0.00017)  |
| <b>Fallow Deer</b> | 0.0033<br>(0.00021)  | 0.0026<br>(0.00015)  | 0.0021<br>(0.00014)   | 0.0031<br>(0.000085) | 0.0024<br>(0.000094) | 0.0017<br>(0.00016)   | 0.0034<br>(0.000057)  | 0.0030<br>(0.00011)  |
| <b>HGGQ</b>        | 0.0042<br>(0.00030)  | 0.0037<br>(0.00036)  | 0.0029<br>(0.00047)   | 0.0050<br>(0.00029)  | 0.0029<br>(0.00023)  | 0.0014<br>(0.00032)   | 0.0046<br>(0.000084)  | 0.0042<br>(0.00011)  |
| <b>QSGQ</b>        | 0.0038<br>(0.00014)  | 0.0034<br>(0.00022)  | 0.0027<br>(0.00023)   | 0.0047<br>(0.00011)  | 0.0030<br>(0.00020)  | 0.0017<br>(0.00022)   | 0.0043<br>(0.00011)   | 0.0044<br>(0.00011)  |
| <b>HSGQ</b>        | 0.0042<br>(0.00024)  | 0.0038<br>(0.00035)  | 0.0021<br>(0.0003)    | 0.0049<br>(0.00023)  | 0.0036<br>(0.00027)  | 0.0016<br>(0.00033)   | 0.0047<br>(0.00015)   | 0.0045<br>(0.00016)  |
| <b>HSAQ</b>        | 0.0031<br>(0.00017)  | 0.0027<br>(0.00014)  | 0.0021<br>(0.00012)   | 0.0033<br>(0.000070) | 0.0023<br>(0.00010)  | 0.0015<br>(0.00019)   | 0.0032<br>(0.00011)   | 0.0030<br>(0.00011)  |
| <b>HSGK</b>        | 0.0036<br>(0.00014)  | 0.0036<br>(0.00023)  | 0.0023<br>(0.00026)   | 0.0048<br>(0.000049) | 0.0032<br>(0.00027)  | 0.0017<br>(0.00024)   | 0.0044<br>(0.00013)   | 0.0042<br>(0.000072) |
| <b>HSAK</b>        | 0.0012<br>(0.00018)  | 0.0011<br>(0.00022)  | 0.00047<br>(0.00017)  | 0.0021<br>(0.000076) | 0.00083<br>(0.00016) | 0.00045<br>(0.00017)  | 0.0020<br>(0.000094)  | 0.0015<br>(0.000099) |
| <b>QGGK</b>        | 0.0017<br>(0.00018)  | 0.0017<br>(0.00019)  | 0.0008<br>(0.00019)   | 0.0025<br>(0.00024)  | 0.0011<br>(0.00026)  | 0.00044<br>(0.00011)  | 0.0020<br>(0.00022)   | 0.0011<br>(0.00022)  |
| <b>Canine</b>      | 0.0012<br>(0.00019)  | 0.00089<br>(0.00021) | 0.00039<br>(0.00015)  | 0.0020<br>(0.000094) | 0.00051<br>(0.00015) | 0.00029<br>(0.00015)  | 0.0015<br>(0.00022)   | 0.0012<br>(0.00018)  |

**Supplementary Table 1:** Summary of the amplification rates of the eight CWD isolates across cervid substrates. Average rates as well as standard errors (in parentheses) are shown.

| <b>Allele</b>      | <b>Isolate 1</b> | <b>Isolate 2</b> | <b>Isolate 3</b> | <b>Isolate 4</b> | <b>Isolate 5</b> | <b>Isolate 6</b> | <b>Isolate 7</b> | <b>Isolate 8</b> |
|--------------------|------------------|------------------|------------------|------------------|------------------|------------------|------------------|------------------|
| <b>QGAQ</b>        | 14.12<br>(0.65)  | 14.76<br>(0.61)  | 12.43<br>(0.49)  | 9.103<br>(0.39)  | 8.15<br>(0.41)   | 11.78<br>0.5086  | 12.46<br>0.5397  | 14.8<br>0.595    |
| <b>QGGQ</b>        | 14.91<br>(0.90)  | 15.1<br>(1.0)    | 13.76<br>(0.84)  | 12.6<br>(0.63)   | 10.23<br>(0.59)  | 13.47<br>(0.67)  | 16.08<br>(1.1)   | 15.65<br>(0.90)  |
| <b>QSAQ</b>        | 19.78<br>(0.60)  | 19<br>(0.72)     | 17.7<br>(0.43)   | 12.94<br>(0.36)  | 12.42<br>(0.41)  | 17.72<br>(0.55)  | 22.32<br>(0.46)  | 20.39<br>(0.33)  |
| <b>HGAQ</b>        | 16.44<br>(0.5)   | 15.29<br>(0.56)  | 14.3<br>(0.53)   | 11.3<br>(0.34)   | 10.03<br>(0.31)  | 13.47<br>(0.47)  | 18.19<br>(0.52)  | 18.86<br>(0.35)  |
| <b>QGAK</b>        | 20.31<br>(0.72)  | 18.36<br>(0.79)  | 12.03<br>(0.52)  | 11.08<br>(0.35)  | 9.759<br>(0.40)  | 12.68<br>(0.58)  | 20.11<br>(0.56)  | 20.96<br>(0.45)  |
| <b>225F</b>        | 19.3<br>(1.1)    | 18.81<br>(1.0)   | 18.39<br>(1.0)   | 16.06<br>(0.70)  | 14.02<br>(0.68)  | 13.89<br>(0.70)  | 19.07<br>(0.93)  | 17.11<br>(0.96)  |
| <b>132M</b>        | 19.89<br>(0.66)  | 21.64<br>(0.89)  | 18.19<br>(0.61)  | 14.49<br>(0.51)  | 11.38<br>(0.50)  | 18.49<br>(0.64)  | 20.72<br>(0.76)  | 20.5<br>(1.1)    |
| <b>132L</b>        | 5.224<br>(0.084) | 6.687<br>(0.14)  | 5.588<br>(0.13)  | 4.773<br>(0.16)  | 3.796<br>(0.082) | 6.121<br>(0.21)  | 6.348<br>(0.12)  | 5.873<br>(0.22)  |
| <b>138N</b>        | 33.47<br>(1.2)   | 28.04<br>(1.6)   | 27.53<br>(1.1)   | 25.17<br>(0.71)  | 12.33<br>(0.91)  | 20.17<br>(1.2)   | 27.12<br>(0.91)  | 25.7<br>(1.2)    |
| <b>MSSM</b>        | 24.04<br>(1.0)   | 26.19<br>(1.5)   | 17.26<br>(0.73)  | 17.44<br>(0.71)  | 11.55<br>(0.67)  | 15.82<br>(0.98)  | 17.01<br>(0.70)  | 16.94<br>(1.1)   |
| <b>225Y</b>        | 18.24<br>(1.5)   | 26.15<br>(2.1)   | 18.4<br>(1.5)    | 14.98<br>(1.1)   | 7.066<br>(0.66)  | 12.37<br>(1.1)   | 14.44<br>(1.2)   | 9.703<br>(0.88)  |
| <b>Fallow Deer</b> | 9.068<br>(0.27)  | 9.867<br>(0.36)  | 8.417<br>(0.30)  | 4.435<br>(0.18)  | 4.271<br>(0.19)  | 7.121<br>(0.27)  | 9.106<br>(0.22)  | 8.607<br>(0.21)  |
| <b>HGGQ</b>        | 14.9<br>(0.71)   | 15.36<br>(0.84)  | 13.41<br>(0.68)  | 13.65<br>(0.69)  | 12.17<br>(0.49)  | 12.07<br>(0.63)  | 15.86<br>(0.84)  | 15<br>(0.72)     |
| <b>QSGQ</b>        | 20.29<br>(0.87)  | 21.14<br>(1.1)   | 19.31<br>(0.87)  | 17.05<br>(0.81)  | 13.88<br>(0.59)  | 17.47<br>(0.72)  | 21.41<br>(1.0)   | 22.55<br>(0.90)  |
| <b>HSGQ</b>        | 23.06<br>(0.84)  | 19.2<br>(0.89)   | 17.45<br>(0.69)  | 14.17<br>(0.61)  | 12.17<br>(0.58)  | 15.8<br>(0.71)   | 21<br>(0.81)     | 25.05<br>(0.77)  |
| <b>HSAQ</b>        | 32.06<br>(0.95)  | 23.93<br>(1.2)   | 19.49<br>(0.85)  | 16.47<br>(0.66)  | 16.08<br>(0.67)  | 20.87<br>(1.0)   | 28.98<br>(0.92)  | 29.74<br>(0.74)  |
| <b>HSGK</b>        | 20.89<br>(1.1)   | 21.03<br>(1.3)   | 19.79<br>(1.1)   | 18.09<br>(0.99)  | 16.66<br>(0.92)  | 17.4<br>(0.96)   | 22.86<br>(1.3)   | 22.64<br>(1.3)   |
| <b>HSAK</b>        | 26.24<br>(1.5)   | 21.06<br>(1.3)   | 15.32<br>(0.79)  | 17.71<br>(0.64)  | 18.9<br>(0.78)   | 18.39<br>(1.0)   | 27.47<br>(1.4)   | 29.74<br>(1.7)   |
| <b>QGGK</b>        | 17.94<br>(0.73)  | 20.73<br>(0.85)  | 10.87<br>(0.57)  | 11.78<br>(0.37)  | 9.858<br>(0.32)  | 6.941<br>(0.33)  | 20.32<br>(0.79)  | 24.18<br>(0.92)  |
| <b>Canine</b>      | 10.61<br>(0.50)  | 10.8<br>(0.41)   | 10.91<br>(0.51)  | 11.33<br>(0.31)  | 9.586<br>(0.38)  | 9.828<br>(0.35)  | 11.97<br>(0.22)  | 11.02<br>(0.42)  |

**Supplementary Table 2:** Summary of the amyloid seeding efficiencies of the eight CWD isolates across cervid substrates. Average efficiencies as well as standard errors (in parentheses) are shown.
